# Supplementary figures and images for: Time Series Modeling of Tuberculosis Cases in India from 2017 to 2022 Based on the SARIMA‐NNAR Hybrid Model
Source: Hindawi journal article supplement (doi:10.1155/2023/5934552), 2023-01-01

## NNAR Model

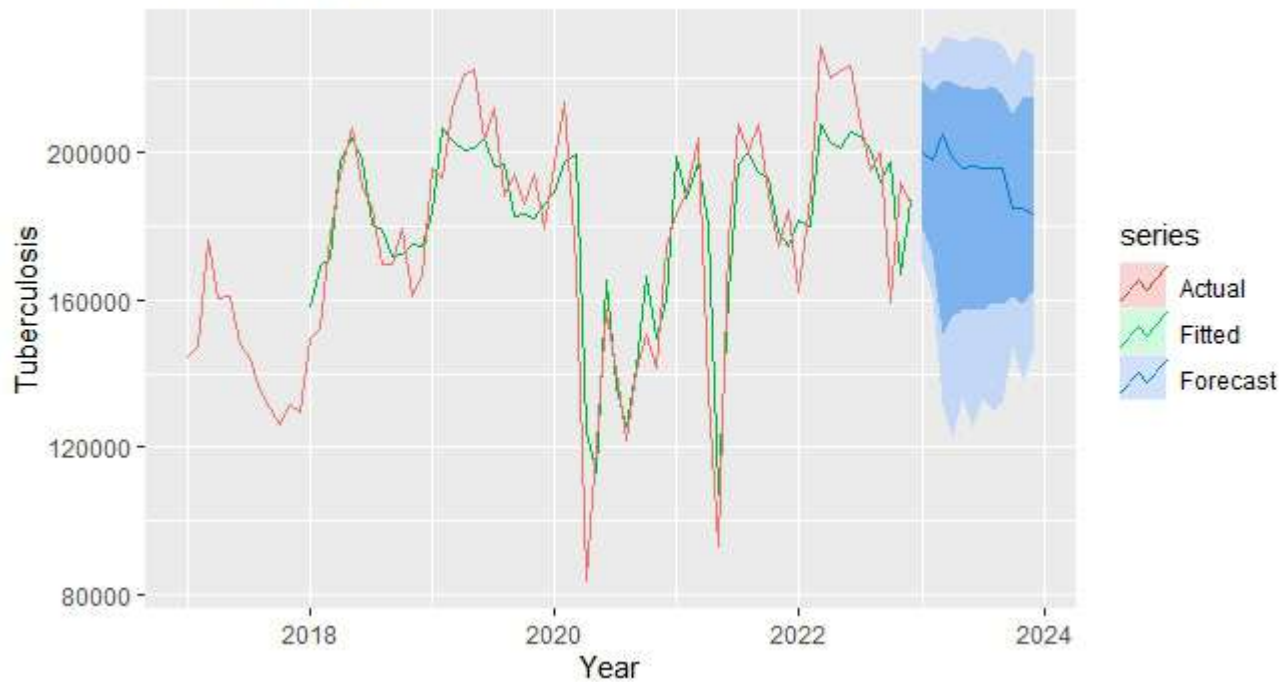

Supplement: f1 [file 5934552.f1.zip]

## SARIMA Model

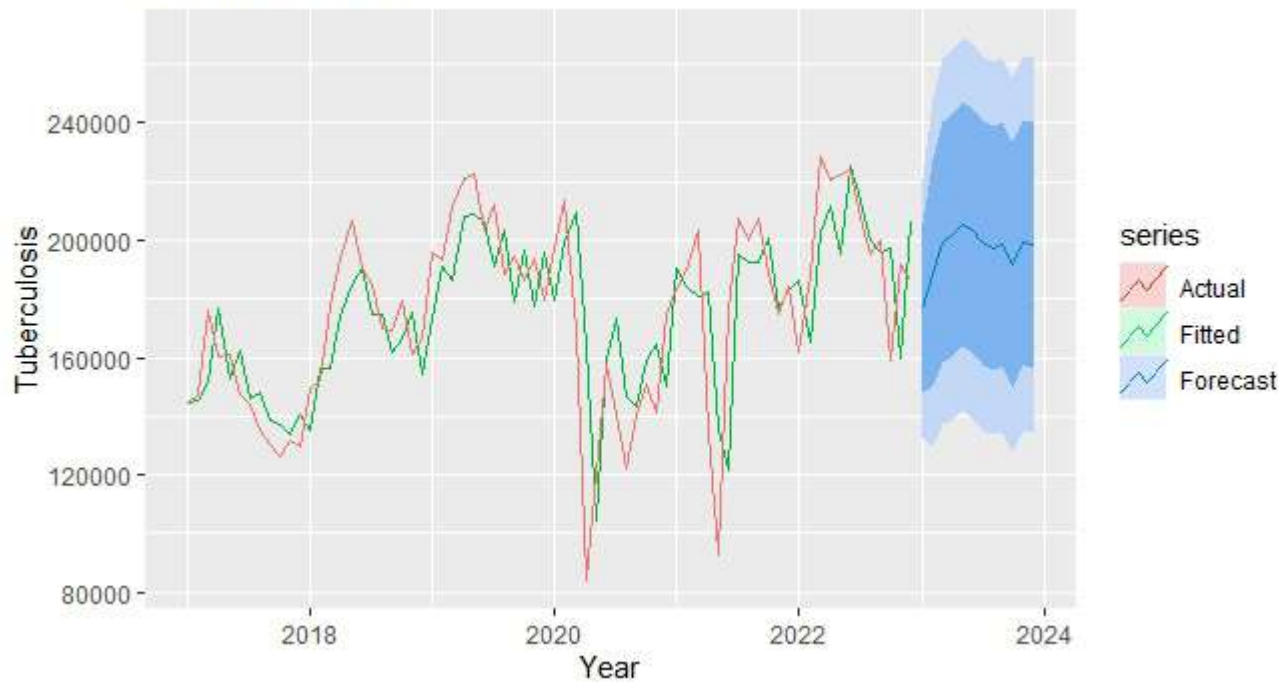

Supplement: f1 [file 5934552.f1.zip]

## HYBRID Model

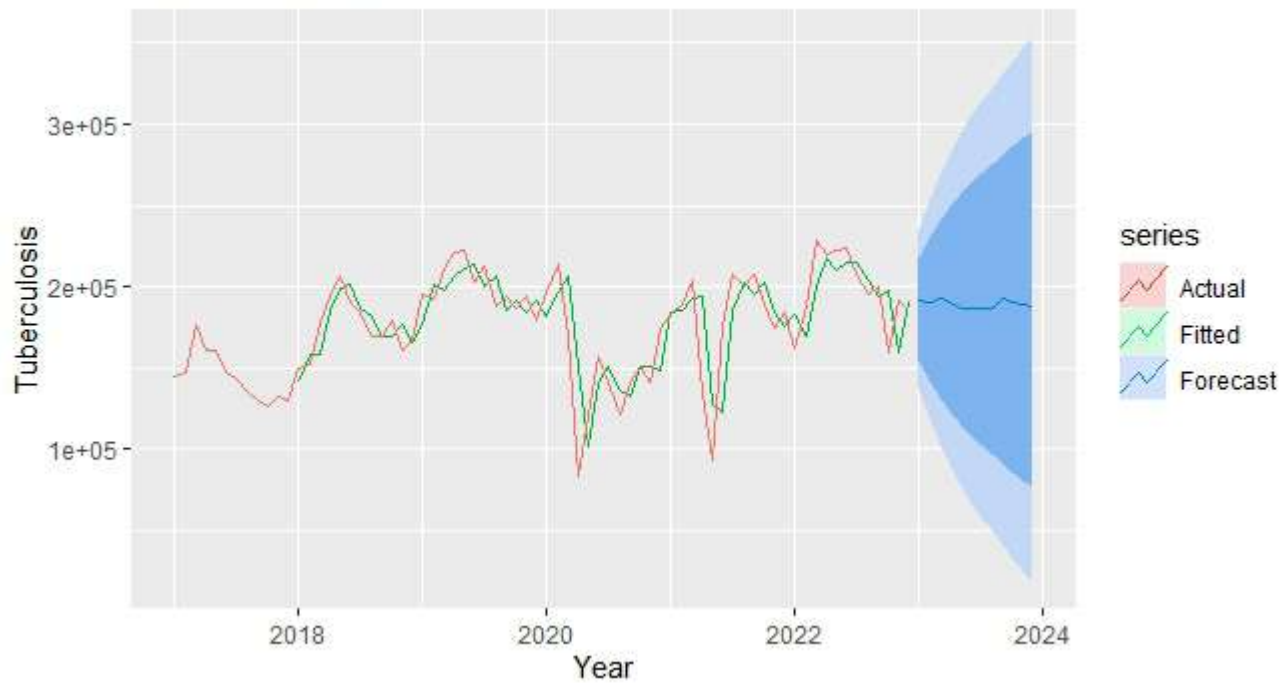

Supplement: f1 [file 5934552.f1.zip]
